# Supplementary material
Source: PubMed Central journal article supplement (PMC7863874)
Supplement: supp_RA120.013903_160194_3_supp_610144_qhy8qg.pdf [file supp_RA120.013903_160194_3_supp_610144_qhy8qg.pdf]

# **Kinetic investigation of the polymerase and exonuclease activities of human DNA polymerase epsilon holoenzyme**

Walter J. Zahurancik<sup>a</sup> and Zucai Suo<sup>a,b,\*</sup>

<sup>a</sup>The Ohio State Biochemistry Program, The Ohio State University, Columbus, OH 43210, USA.

<sup>b</sup>Department of Biomedical Sciences, College of Medicine, Florida State University, Tallahassee, FL 32306, USA

\*To whom correspondence should be addressed: Zucai Suo, Department of Biomedical Sciences, College of Medicine, Florida State University, Tallahassee, FL 32306, USA; Tel.: (850) 645-2501; E-mail: [zucai.suo@med.fsu.edu](mailto:zucai.suo@med.fsu.edu)

## **Contents**

**Figure S1** – Pages S-2 and S-4

**Figure S2** – Page S-5

**Figure S3** – Page S-6

**A**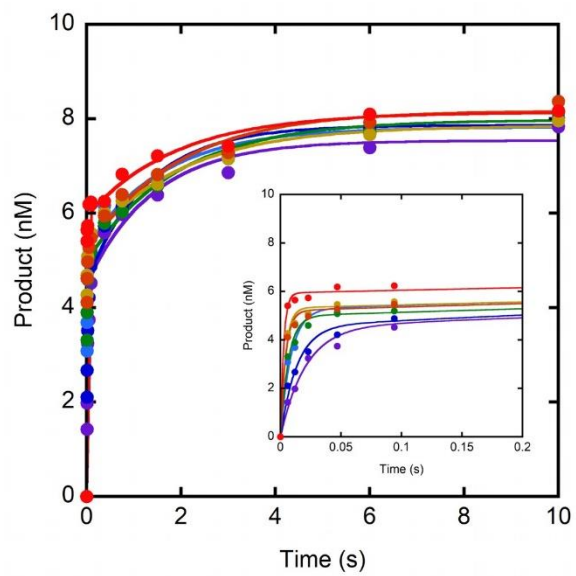**B**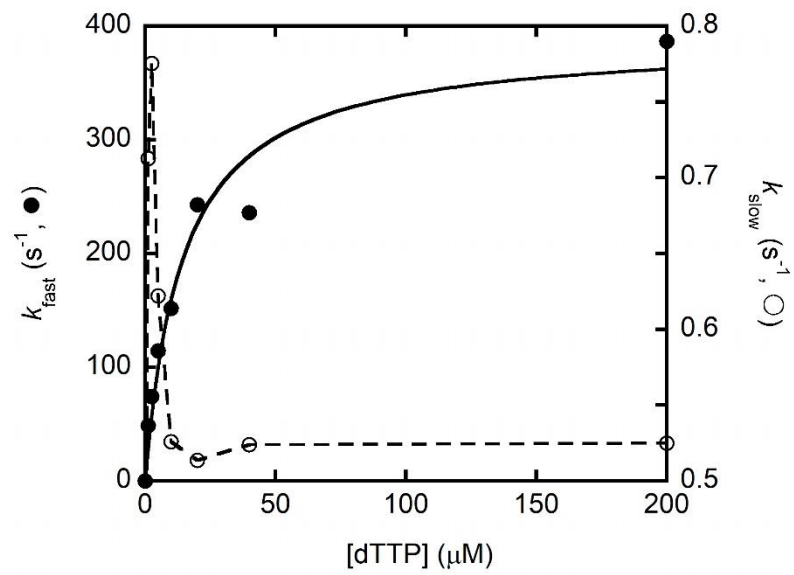

**C**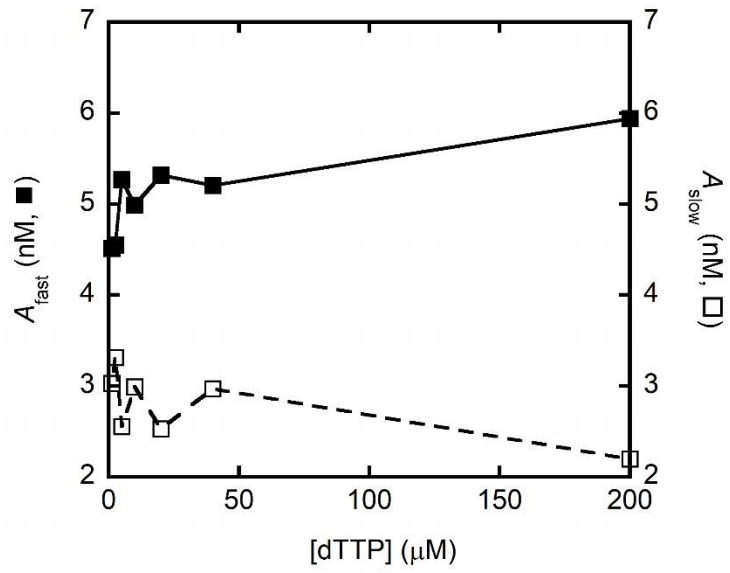**D**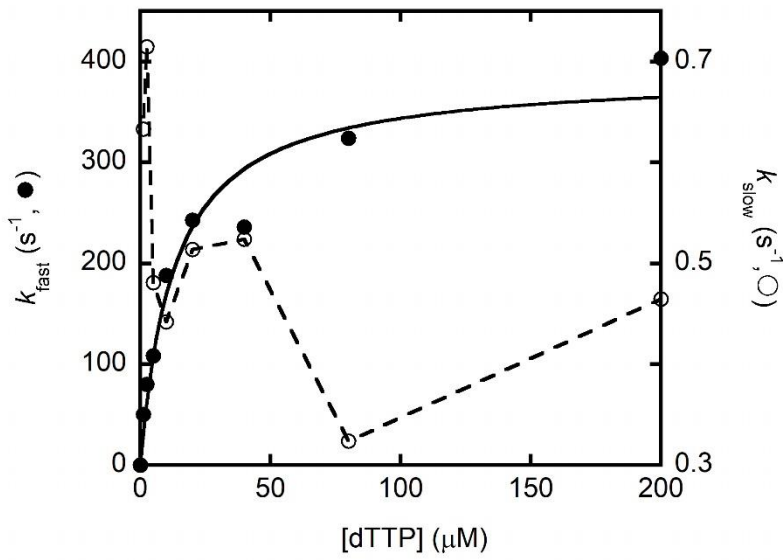

# E

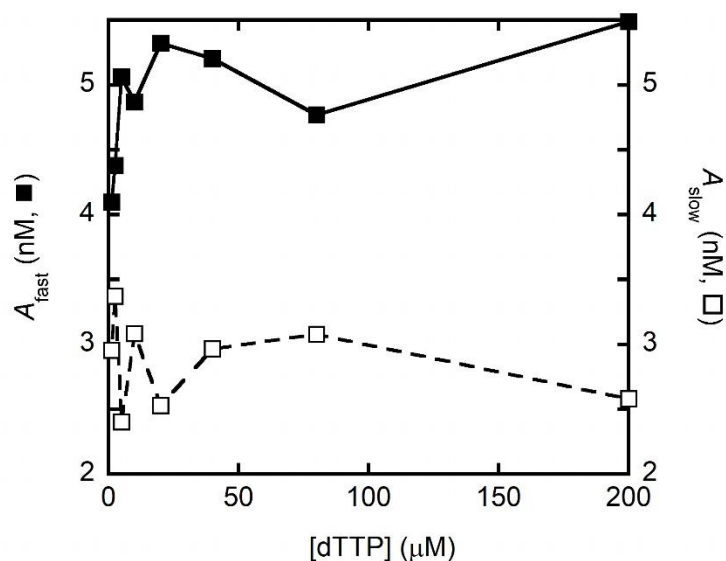

**Figure S1.** Replicate measurement of the pre-steady-state kinetics of correct nucleotide incorporation. (A) A pre-incubated solution of hPol $\epsilon$  exo- (100 nM, UV concentration) and 5'-radiolabeled D-1 DNA substrate (20 nM) was rapidly mixed with 1.25  $\mu$ M (purple), 2.5  $\mu$ M (blue), 5  $\mu$ M (light blue), 10  $\mu$ M (green), 20  $\mu$ M (yellow), 40  $\mu$ M (orange) or 200  $\mu$ M (red) dTTP and  $Mg^{2+}$  for varying incubation times before the reaction was quenched with the addition of EDTA. Product concentration was plotted against time and the data were fit to eq 5. (B) The  $k_{fast}$  and  $k_{slow}$  values for each dTTP concentration were plotted against their respective dTTP concentration. The plot of  $k_{fast}$  versus [dTTP] was fit to eq 7 to yield a  $k_{max}$  of  $388 \pm 30$  s $^{-1}$  and a  $K_d^{dTTP}$  of  $14 \pm 3$   $\mu$ M. The plot of  $k_{slow}$  versus [dTTP] was fit with a smoothed line. (C) The  $A_{fast}$  and  $A_{slow}$  values for each dTTP concentration were plotted against their respective dTTP concentration, and the data were fit with a smoothed line. (D) The average  $k_{fast}$  and  $k_{slow}$  values from the two replicates for each dTTP concentration were plotted against their respective dTTP concentration. The plot of  $k_{fast}$  versus [dTTP] was fit to eq 7 to yield a  $k_{max}$  of  $388 \pm 27$  s $^{-1}$  and a  $K_d^{dTTP}$  of  $13 \pm 3$   $\mu$ M. The plot of  $k_{slow}$  versus [dTTP] was fit with a smoothed line. (E) The average  $A_{fast}$  and  $A_{slow}$  values from the two replicates for each dTTP concentration were plotted against their respective dTTP concentration, and the data were fit with a smoothed line.

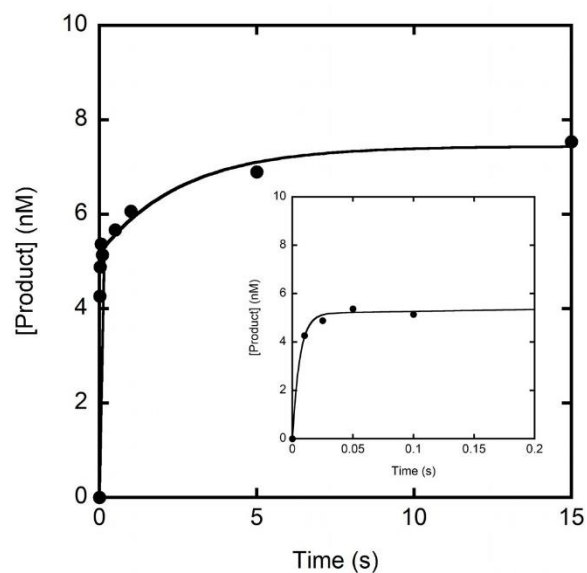

**Figure S2.** Pre-steady-state kinetics of correct nucleotide incorporation in the presence of a DNA trap. A pre-incubated solution of hPol $\epsilon$  *exo-* (100 nM, UV concentration) and 5'-radiolabeled D-1 DNA substrate (20 nM) was rapidly mixed with 100  $\mu$ M dTTP, 2  $\mu$ M unlabeled D-1 DNA trap, and Mg $^{2+}$  for varying incubation times before the reaction was quenched with the addition of EDTA. Product concentration was plotted against time and the data were fit to eq 5. The  $k_{\text{fast}}$  and  $k_{\text{slow}}$  values were  $167 \pm 23 \text{ s}^{-1}$  and  $0.4 \pm 0.1 \text{ s}^{-1}$ , respectively.

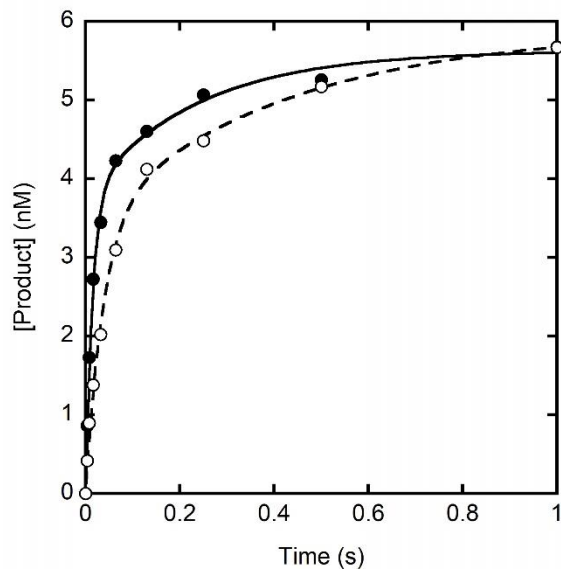

**Figure S3.** Comparison of correct nucleotide incorporation kinetics when using an EDTA or an acid quench. A pre-incubated solution of hPolε exo- (100 nM, UV concentration) and 5'-radiolabeled D-1 DNA substrate (20 nM) was rapidly mixed with 2.5 μM dTTP and Mg<sup>2+</sup> for varying incubation times before the reaction was quenched with the addition of either EDTA (●) or 1 M HCl (○). Samples quenched with 1 M HCl were first extracted by phenol and chloroform and then were neutralized with the addition of 1 M NaOH. Product concentration was plotted against time and the data were fit to eq 5. The  $k_{fast}$  and  $k_{slow}$  values are about 2-fold higher when the reaction is quenched with EDTA than with 1 M HCl.
